# Supplementary material for: Concurrent maternal stress and THC exposure during pregnancy alters adolescent behavioral outcomes and corticolimbic molecular programs
Source: Research Square preprint supplement (doi:10.21203/rs.3.rs-7031901/v1), 2025-07-23
Supplement: Supplementary file [file 1b6654f61b9315f86402d3c8.pdf]

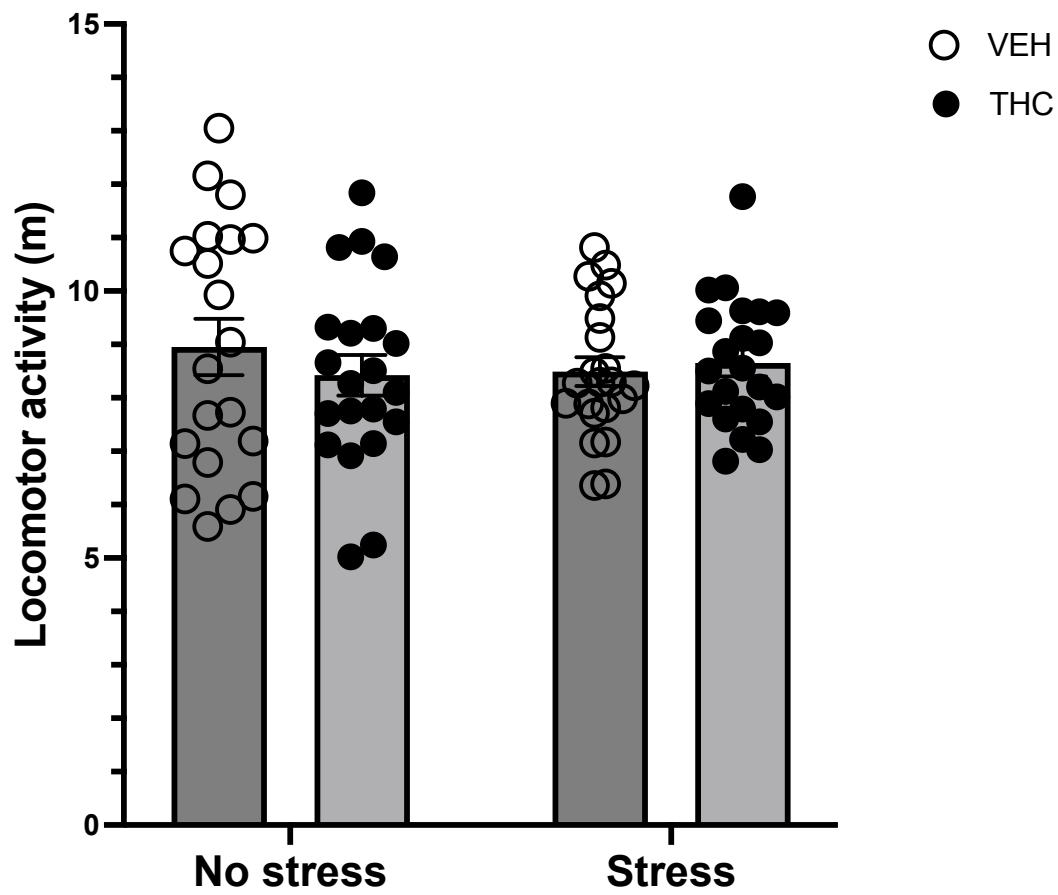

Fig. S1: Locomotor activity of dams in the three-chamber arena. All dams had comparable locomotor activity as the vehicle-exposed groups. There were no interaction effects ( $F_{1,81}=0.91$ ;  $p = 0.34$ ) or main effects of THC ( $F_{1,81}=0.25$ ;  $p = 0.62$ ) or stress exposure ( $F_{1,81}=0.09$ ;  $p = 0.75$ ) on locomotion.
